# Axon morphology and intrinsic cellular properties determine repetitive transcranial magnetic stimulation threshold for plasticity

Christos Galanis<sup>1</sup>, Lena Neuhaus<sup>1</sup>, Nicholas Hananeia<sup>2</sup>, Zsolt Turi<sup>1</sup>,

Peter Jedlicka<sup>2</sup>, Andreas Vlachos<sup>1, 3, 4</sup>

<sup>1</sup>Department of Neuroanatomy, Institute of Anatomy and Cell Biology, Faculty of Medicine, University of Freiburg, Freiburg, Germany

<sup>2</sup>3R-Zentrum Gießen, Justus-Liebig-Universität Giessen, Giessen, Germany

<sup>3</sup>Center BrainLinks-BrainTools, University of Freiburg, Freiburg, Germany

<sup>4</sup>Center for Basics in NeuroModulation (NeuroModulBasics), Faculty of Medicine, University of Freiburg, Freiburg, Germany

Correspondence to

[vlachos@anat.uni-freiburg.de](mailto:vlachos@anat.uni-freiburg.de)

Department of Neuroanatomy,  
Institute of Anatomy and Cell Biology,  
Faculty of Medicine,  
University of Freiburg,  
Freiburg 79104, Germany

Keywords: synaptic plasticity, morphology, axons, inhibition, excitation, whole-cell patch-clamp recordings, organotypic tissue cultures.

Running title: Neuronal morphology and rTMS

Figures: 8, Pages: 31, Words in abstract: 287, Introduction: 617, Discussion: 1509

**Acknowledgements:** We thank Susanna Glaser for skillful assistance in tissue culturing. The work was supported by National Institutes of Health, USA (NIH; 1R01NS109498) and by the Federal Ministry of Education and Research, Germany (BMBF, 01GQ2205A)

## 25 **Abstract**

26 Repetitive transcranial magnetic stimulation (rTMS) is a widely used therapeutic tool in neurology  
27 and psychiatry, but its cellular and molecular mechanisms are not fully understood. Standardizing  
28 stimulus parameters, specifically electric field strength and direction, is crucial in experimental  
29 and clinical settings. It enables meaningful comparisons across studies and facilitating the  
30 translation of findings into clinical practice. However, the impact of biophysical properties  
31 inherent to the stimulated neurons and networks on the outcome of rTMS protocols remains not  
32 well understood. Consequently, achieving standardization of biological effects across different  
33 brain regions and subjects poses a significant challenge. This study compared the effects of 10 Hz  
34 repetitive magnetic stimulation (rMS) in entorhino-hippocampal tissue cultures from mice and  
35 rats, providing insights into the impact of the same stimulation protocol on similar neuronal  
36 networks under standardized conditions. We observed the previously described plastic changes in  
37 excitatory and inhibitory synaptic strength of CA1 pyramidal neurons in both mouse and rat tissue  
38 cultures, but a higher stimulation intensity was required for the induction of rMS-induced synaptic  
39 plasticity in rat tissue cultures. Through systematic comparison of neuronal structural and  
40 functional properties and computational modeling, we found that morphological parameters of  
41 CA1 pyramidal neurons alone are insufficient to explain the observed differences between the  
42 groups. However, axon morphologies of individual cells played a significant role in determining  
43 activation thresholds. Notably, differences in intrinsic cellular properties were sufficient to account  
44 for the 10 % higher intensity required for the induction of synaptic plasticity in the rat tissue  
45 cultures. These findings demonstrate the critical importance of axon morphology and intrinsic  
46 cellular properties in predicting the plasticity effects of rTMS, carrying valuable implications for  
47 the development of computer models aimed at predicting and standardizing the biological effects  
48 of rTMS.

## 49 INTRODUCTION

50 Repetitive transcranial magnetic stimulation (rTMS) is a non-invasive technique that modulates  
51 cortical excitability beyond the stimulation period (Chen et al., 1997; Huang et al., 2005; Suppa et  
52 al., 2016). Despite its increasing use for treating neuropsychiatric disorders such as major  
53 depression (Cocchi et al., 2018; Garnaat et al., 2018; Rehn et al., 2018; Voigt et al., 2019; Somaa  
54 et al., 2022), the cellular and molecular mechanisms of rTMS in human cortical networks remain  
55 not well understood (Müller-Dahlhaus and Vlachos, 2013; Cirillo et al., 2017). Animal models,  
56 both *in vivo* and *in vitro*, have provided important insights into mechanisms by which rTMS  
57 modifies neuronal circuit excitability and plasticity (Vlachos et al., 2012; Tokay et al., 2014; Lenz  
58 et al., 2016; Hong et al., 2020; Romero et al., 2022; Eichler et al., 2023). It has been shown for  
59 example that rTMS affects the functional and structural properties of excitatory and inhibitory  
60 synapses (Tokay et al., 2009; Vlachos et al., 2012; Lenz et al., 2016), and that it facilitates the  
61 reorganisation of abnormal cortical circuits (Tang et al., 2021; Moretti et al., 2022). Recently,  
62 experimental evidence for an involvement of microglia, the brains resident immune cells in rTMS-  
63 induced synaptic plasticity was provided (Eichler et al., 2023).

64 Although rTMS has shown robust neurobiological effects in animal models, its efficacy in  
65 humans varies significantly (Goldsworthy et al., 2014; López-Alonso et al., 2014; Vallence et al.,  
66 2015; Guerra et al., 2020) due to challenges in dose standardization, among others (Peterchev et  
67 al., 2012; Turi et al., 2021). Considerable effort has been made to standardize the electric field  
68 strength across brain regions and subjects to improve reproducibility and better understand the  
69 effects of single pulse and rTMS across brain regions (Opitz et al., 2011; Thielscher et al., 2011;  
70 Saturnino et al., 2019). Meanwhile, it is becoming increasingly clear that computational models  
71 that predict the strength and orientation of TMS-induced electric field must be extended to  
72 biological effects (c.f., Turi et al., 2022), i.e., the electric fields must be coupled to biophysically

73 realistic models (Aberra et al., 2018; Shirinpour et al., 2021). Indeed, these computational  
74 approaches provided important insight into the role of neuronal morphologies, specifically axons  
75 and myelination, which seem to play a critical role for single pulse TMS (Aberra et al., 2020).  
76 Although some attempts have been made to compute rTMS-induced changes in intracellular  
77 calcium levels, which could be used to predict plasticity effects (Shirinpour et al., 2021), our  
78 knowledge regarding dose-response interrelation of rTMS-induced synaptic plasticity is limited.  
79 As a consequence, it is currently also not possible to compute and standardize synaptic plasticity  
80 induction across brain regions and subjects.

81         In this study, we investigated the after effects of 10 Hz repetitive magnetic stimulation  
82 (rMS) and explored how structural, electrophysiological, and network properties may influence  
83 the plasticity response of neurons. To this end we employed a cross-species strategy to compare  
84 seemingly similar neurons and networks and studied the effects of rMS in mouse and rat entorhino-  
85 hippocampal slice cultures. Notably, we discovered that a 10% stronger intensity, i.e., maximum  
86 stimulator output (MSO), was required to induce plasticity in rat CA1 pyramidal neurons  
87 compared to their mouse counterparts. To address this discrepancy, we examined various factors,  
88 including the structural characteristics of the neurons, their electrophysiological properties, and  
89 the network dynamics within which they operate. By thoroughly investigating these elements, we  
90 aimed to uncover the mechanisms underlying the differential responsiveness of rat and mouse CA1  
91 pyramidal neurons to 10 Hz rMS. Our findings provide new insights into the cellular determinants  
92 that govern the plasticity outcomes of rTMS and shed light on the factors influencing the  
93 effectiveness of the stimulation, with important consequences for the standardisation of biological  
94 dose in comparable neuronal networks within and across subjects.

## 95 **MATERIALS AND METHODS**

96 **Ethics statement:** Mice and rats were maintained in a 12-hour light/dark cycle with food and  
97 water ad libitum. Every effort to minimize the distress and pain of animals was made. All  
98 experimental procedures were performed according to the German animal welfare legislation,  
99 approved by the appropriate animal welfare committee and the animal welfare officer of the  
100 University of Freiburg.

101 **Animals:** Mice of the strain C57BL6/J and rats of the strain Wistar (CrI:WI) of both sexes were  
102 used in this study.

103 **Preparation of organotypic entorhino-hippocampal tissue cultures:** Organotypic tissue  
104 cultures containing the hippocampus and the entorhinal cortex were prepared at postnatal day 3-5  
105 from mice and rats of either sex as described previously (Galanis et al., 2021; Vlachos et al. 2012).  
106 The tissue cultures were maintained in an incubator at 35 °C with 5 % CO<sub>2</sub> for at least 18 days  
107 before any experimental assesment. Tissue culture medium was changed 3 times per week and  
108 consisted of 50% (v/v) MEM, 25% (v/v) basal medium eagle (BME), 25% (v/v) heat-inactivated  
109 normal horse serum, 25 mm HEPES, 0.15% (w/v) NaHCO<sub>3</sub>, 0.65% (w/v) glucose, 0.1 mg/ml  
110 streptomycin, 100 U/ml penicillin, and 2 mm Glutamax (pH 7.3 with HCl or NaOH).

111 **rMS in vitro:** Tissue cultures were transferred in a standard 35 mm petri dish filled with standard  
112 extracellular solution (129 mM NaCl, 4 mM KCl, 1 mM MgCl<sub>2</sub>, 2 mM CaCl<sub>2</sub>, 4.2 mM glucose,  
113 10 mM HEPES, 0.1 mg/ml streptomycin, 100 U/ml penicillin, pH 7.4; preheated to 35 °C;  
114 365mOsm with sucrose). A standard 70-mm figure-of-eight coil (D70 Air Film Coil, Magstim)  
115 connected to a Magstim Super Rapid2 Plus1 (Magstim) was placed 1 mm above the lid of the petri  
116 dish and the cultures were stimulated with a protocol consisting of 900 pulses at 10 Hz. Tissue  
117 cultures were orientated in a way that the induced electric field within the tissue was approximately

118 parallel to the dendritic tree of CA1 pyramidal neurons. Different stimulation intensities  
119 (maximum stimulator output – MSO) were used in this study and are reported in each experiment  
120 respectively. Species-, age- and time-matched cultures were not stimulated, but otherwise treated  
121 identical to stimulated cultures served as the controls.

122 **Whole-cell voltage-clamp recordings:** Whole-cell voltage-clamp recordings of CA1 pyramidal  
123 cells were conducted at 35°C. The bath solution contained 126 mM NaCl, 2.5 mM KCl, 26  
124 mM NaHCO<sub>3</sub>, 1.25 mM NaH<sub>2</sub>PO<sub>4</sub>, 2 mM CaCl<sub>2</sub>, 2 mM MgCl<sub>2</sub>, and 10 mM glucose and was  
125 saturated with 95% O<sub>2</sub>/5% CO<sub>2</sub>. A-amino-3-hydroxy-5-methyl-4-isoxazolepropionic acid  
126 (AMPA) receptor mediated miniature excitatory postsynaptic currents (mEPSCs) were recorded  
127 in the presence of 10 μM D-APV and 0.5 μM TTX in the bath solution while the patch pipettes  
128 contained 126 mM K-gluconate, 4 mM KCl, 4 mM ATP-Mg, 0.3 mM GTP-Na<sub>2</sub>, 10 mM PO-  
129 creatine, 10 mM HEPES, and 0.1% (w/v) biocytin (pH 7.25 with KOH, 290 mOsm with sucrose).  
130 Gamma-aminobutyric acid (GABA) receptor mediated miniature inhibitory post synaptic currents  
131 (mIPSCs) were recorded in the presence of 0.5 μM TTX, 10 μM D-APV, and 10 μM CNQX in  
132 the bath solution while the patch pipettes contained 125 mM CsCl, 5 mM NaCl, 2 mM MgCl<sub>2</sub>,  
133 2 mM Mg-ATP, 0.5 mM Na<sub>2</sub>-GTP, 0.1 mM EGTA and 10 mM HEPES (pH=7.33 with CsOH;  
134 275 mOsm with sucrose). Neurons were recorded at a holding potential of –70 mV. Series  
135 resistance was monitored in 2 - 4 min intervals and recordings were discarded if the series  
136 resistance reached  $\geq 30$  MΩ and the leak current changed significantly.

137 **Whole-cell current-clamp recordings:** Whole-cell current-clamp recordings of CA1 pyramidal  
138 cells were conducted at 35°C. The bath solution contained 126 mM NaCl, 2.5 mM KCl, 26  
139 mM NaHCO<sub>3</sub>, 1.25 mM NaH<sub>2</sub>PO<sub>4</sub>, 2 mM CaCl<sub>2</sub>, 2 mM MgCl<sub>2</sub>, 10 mM glucose, 10 μM D-APV,  
140 10 μM CNQX, and 10 μM bicuculline methiodide and was saturated with 95% O<sub>2</sub>/5% CO<sub>2</sub>. Patch

141 pipettes contained 126 mM K-gluconate, 4 mM KCl, 4 mM ATP-Mg, 0.3 mM GTP-Na<sub>2</sub>, 10 mM  
142 PO-creatine, 10 mM HEPES, and 0.1% (w/v) biocytin (pH 7.25 with KOH, 290 mOsm with  
143 sucrose). Neurons were hyperpolarized with -100 pA and then depolarized up to +400 pA with 1-  
144 s-long 10 pA current injection steps. Pipette capacitance was neutralized, bridge balance activated  
145 and series resistance was monitored before and after the recording of each cell. Recordings were  
146 discarded if the series resistance reached  $\geq 15$  M $\Omega$ .

147 **High-density microelectrode array (HD-MEA) recordings:** HD-MEA recordings of mouse and  
148 rat tissue cultures were conducted at 35°C. The bath solution contained 126 mM NaCl, 2.5  
149 mM KCl, 26 mM NaHCO<sub>3</sub>, 1.25 mM NaH<sub>2</sub>PO<sub>4</sub>, 2 mM CaCl<sub>2</sub>, 2 mM MgCl<sub>2</sub>, 10 mM glucose  
150 and was saturated with 95% O<sub>2</sub>/5% CO<sub>2</sub>. Tissue cultures were placed on an Accura HD-MEA  
151 chip (3Brain, Switzerland) containing 4096 electrodes and left to acclimatize for 2 min before  
152 starting the experiment. Each tissue culture was recorded for 10 min with a BioCAM Duplex  
153 (3Brain, Switzerland).

154 **Neuronal filling, post hoc staining and imaging:** CA1 pyramidal neurons were patched with  
155 pipettes containing 126 mM K-gluconate, 4 mM KCl, 4 mM ATP-Mg, 0.3 mM GTP-Na<sub>2</sub>, 10 mM  
156 PO-creatine, 10 mM HEPES, and 1% (w/v) biocytin (pH 7.25 with KOH, 290 mOsm with  
157 sucrose). To achieve a comprehensive visualization of axonal morphologies, an elevated biocytin  
158 concentration was necessary. Only a single cell was filled within each culture, facilitating the clear  
159 identification of axons specific to that neuron. The neurons were kept in the whole-cell  
160 configuration for at least 10 min during which they were depolarized with 100 ms current  
161 injections of 200 pA at 5 Hz. Tissue cultures were fixed in a solution of 4% (w/v) PFA and 4%  
162 (w/v) sucrose in 0.01 M PBS for 1 h. The fixed tissue was incubated for 1 h with 10% (v/v) NGS  
163 and 0.5% (v/v) Triton X-100 in 0.01 M PBS. Biocytin (Sigma Millipore, catalog #B4261) filled

164 cells were stained with Alexa488-conjugated streptavidin (Thermo Fisher Scientific; 1:1000; in  
165 0.01 m PBS with 10% NGS and 0.1% Triton X-100) for 4 h, and DAPI (Thermo Fisher Scientific)  
166 staining was used to visualize cytoarchitecture (1:5000; in 0.01 m PBS for 15 min). Slices were  
167 washed, transferred, and mounted onto glass slides for visualization. Streptavidin-stained CA1  
168 pyramidal neurons were visualized and multiple z-stacks (step size 0.5  $\mu\text{m}$ ) were obtained with a  
169 Leica Microsystems TCS SP8 laser scanning microscope with 20 $\times$  (NA 0.75), 40 $\times$  (NA 1.30), and  
170 63 $\times$  (NA 1.40) oil-submersion objectives.

171 **Neuronal reconstructions:** CA1 pyramidal cells were reconstructed using NeuroLucida 360 (ver.  
172 2019.1.3; MBF Bioscience) as described previously (Shirinpour et al., 2021). Briefly, neuronal  
173 somata were reconstructed using the manual contour tracing option, with the contour tracing set to  
174 ‘Cell Body’. Apical and basal dendrites as well as axons were subsequently reconstructed in the  
175 NeuroLucida 3D environment under the ‘User-guided’ tracing option using the ‘Directional  
176 Kernels’ method.

177 **Electric field modeling:** Finite element method was used to create a three-dimensional mesh  
178 model consisting of two compartments, representing the bath solution and organotypic tissue  
179 cultures. The physical dimensions of the mesh model were based on the physical parameters of the  
180 in vitro settings, with a coil-to-Petri dish distance of 1 mm and the coil positioned above the  
181 culture. Electrical conductivities of 1.654 S/m and 0.275 S/m were assigned to the bath solution  
182 and culture respectively. The rate of change of the coil current was set to 1.4 A/ms at 1% MSO  
183 and scaled up to stimulation intensities ranging from 40 % to 60 % MSO. Simulations of  
184 macroscopic electric fields were performed using SimNIBS (3.2.6) and MATLAB (2023a). A  
185 validated 70 mm MagStim figure-of-eight coil was utilized in all simulations (Thielscher et al.,



186 2004). The 99th percentile of the E-field, which represents the robust maximum value, was  
187 extracted from the volume compartment of the tissue culture.

188 **Single cell modelling:** Reconstructions were imported into the NeMo-TMS pipeline and endowed with  
189 a Jarsky model (Jarsky et al., 2005). When axons are "swapped", the original axon is removed from the cell  
190 at the point of intersection with the soma or dendrite, and replaced with the axon of another cell that has  
191 been severed at the same point. Each cell is oriented with the apical dendrite pointing in the positive y  
192 direction, and axon orientations relative to this are preserved in the swapping process. For single-cell  
193 simulations, TMS is simulated as a uniform electric field of varying intensity, with the threshold defined as  
194 the smallest TMS amplitude that elicits a somatic action potential.

195 **Experimental design and statistical analysis:** Analyses were performed with the person  
196 analyzing the data blind to the experimental condition. For this project, we used one or two tissue  
197 cultures from each animal. Electrophysiological data were analyzed using pClamp 11.2 software  
198 suite (Molecular Devices), the Easy Electrophysiology 2.5.0.2 (Easy Electrophysiology Ltd.) and  
199 BrainWave (3Brain) software. Statistical comparisons were made using Mann–Whitney test (to  
200 compare two groups) two-way ANOVA and Kruskal-Wallis test as indicated in the figure captions  
201 and text (GraphPad Prism 7, GraphPad Software). p values of <0.05 were considered a significant  
202 difference. All values represent mean  $\pm$  SEM.

203 **Digital illustrations:** Confocal image stacks were exported as 2D projections and stored as TIFF  
204 files. Figures were prepared using Photoshop graphics software (Adobe). Image brightness and  
205 contrast were adjusted.

206 **RESULTS**

207 **10 Hz repetitive magnetic stimulation induces plasticity of excitatory and inhibitory synapses**  
208 **in mouse CA1 pyramidal neurons.**

209 A 10 Hz stimulation protocol consisting of 900 pulses at 50% MSO was used to assess the effects  
210 of rMS on synaptic plasticity in brain tissue cultures prepared from mice of either sex (Fig. 1A-  
211 C). Individual CA1 pyramidal neurons were patched and AMPA receptor mediated mEPSCs were  
212 recorded 2 – 4 h after stimulation. In line with our previous work [c.f., (Vlachos et al., 2012; Lenz  
213 et al., 2015, 2020; Eichler et al., 2023)] a significant increase in mean mEPSC amplitude was  
214 observed as compared to age-/time-matched control cultures that were treated in the exact same  
215 way except for rMS (control; Figure 1D-E).

216 In a different set of cultures, we assessed 10 Hz rMS-induced changes in GABA receptor  
217 mediated mIPSCs onto CA1 pyramidal neurons using the experimental approach described above.  
218 A reduction in mean mIPSC amplitude was observed in these experiments as reported in our  
219 previous study [(Fig. 1F-G); c.f., (Lenz et al., 2016)]. These results confirm the robust effects of  
220 10 Hz rMS on mEPSC and mIPSC amplitudes of CA1 pyramidal neurons of entorhino-  
221 hippocampal tissue cultures, which are consistent with a potentiation of excitatory synapses and a  
222 depression of inhibitory synapses.

223 **10 Hz repetitive magnetic stimulation at 50% MSO does not affect synaptic strength in rat**  
224 **CA1 pyramidal neurons.**

225 The effects of the same 10 Hz protocol (10 Hz, 900 pulses, 50% MSO) were tested in tissue  
226 cultures prepared from rat brains (Fig. 2). Age-matched rat tissue cultures displayed a larger cross-  
227 section than mouse tissue cultures (Fig. 2A), without any apparent morphological differences in

228 CA1 pyramidal neurons (Fig. 2B). Recordings of AMPA receptor mediated mEPSCs from CA1  
229 pyramidal neurons showed no statically significant differences between control and 10 Hz rMS-  
230 stimulated preparations (Fig. 2A-B). Inhibitory synaptic strength was also unaffected, as no  
231 significant differences in mean mIPSC amplitude and frequency were detected 2 – 4 h after  
232 stimulation (Fig. 2C-D).

233 **Macroscopic electric field simulations reveal distinct maximum electric fields generated in**  
234 **mouse and rat tissue cultures.**

235 The electric field (E-field) strength induced in the mouse and rat slice cultures was described using  
236 computational modeling. Three-dimensional mesh models were created with two compartments  
237 (i.e., bath solution and slice cultures) using the finite element method (Fig. 3A). The physical  
238 dimensions of the mesh models were adapted from data obtain in mouse and rat brain issue cultures  
239 (Fig. 3B). Macroscopic modeling of the E-field revealed that stimulation at 50% MSO induces a  
240 stronger electric field in the mouse (20.4 V/m) when compared to the rat tissue culture (19.3 V/m).  
241 Based on the modeling we determined that 53 % MSO stimulation of rat tissue cultures would  
242 result in an E-field that is comparable to what we estimated in the mouse tissue cultures stimulated  
243 with 50 % MSO (Fig. 3C). Accordingly, another set of rat tissue cultures was stimulated with 53  
244 % MSO (10 Hz, 900 pulses) and AMPA-receptor mediated mEPSCs were recorded from CA1  
245 pyramidal neurons 2 – 4 h after stimulation. No significant differences in mean mEPSC amplitude  
246 and frequency were observed in these experiments (Fig. 3D). We conclude that simulation-based  
247 standardization of electric fields may not suffice to achieve comparable biological effects in mouse  
248 and rat CA1 pyramidal neurons, i.e., in neurons embedded in networks with comparable  
249 architectures and properties.

250 **Baseline network activity is not significantly different between mouse and rat tissue cultures.**

251 To test for differences in spontaneous network activity between mouse and rat entorhino-  
252 hippocampal slice cultures basal firing rates and field potential rates were recorded in a different  
253 set of 3-week-old mouse and rat tissue cultures using high-density microelectrode array recordings  
254 (Fig. 4A, B). No significant differences between mouse and rat tissue cultures were observed in  
255 firing and field potential (FP) rates in these experiments (Fig. 4C-F). We conclude that baseline  
256 network activity is not responsible for the inability of rMS to induce plasticity in rat CA1 pyramidal  
257 neurons.

258 **No significant differences in structural properties of cultured mouse and rat CA1 pyramidal**  
259 **neurons.**

260 To investigate whether differences in CA1 pyramidal neuron size and complexity could explain  
261 the variation in rMS outcome, we reconstructed biocytin-filled and streptavidin-A488 stained CA1  
262 pyramidal neurons from both rat and mouse hippocampal tissue cultures and analyzed their  
263 dendrites and axons (Fig. 5). This was motivated by the observation that the brain sizes of mice  
264 and rats, as well as their tissue cultures, differ.

265 No significant differences were observed between the two groups in apical and basal  
266 dendritic length (Fig. 5C, D). Sholl and diameter/volume analyses (Fig. 5E-G) did not show any  
267 statistical significance between CA1 dendrites and their complexity of rat and mouse CA1  
268 pyramidal neurons in entorhino-hippocampal tissue cultures. Similarly, no significant differences  
269 were observed when CA1 axons were reconstructed and compared in mouse and rat tissue cultures  
270 (Fig. 5I-L.) We conclude, that structural properties of individual CA1 pyramidal neurons are not

271 statistically different and cannot explain why the rat tissue cultures do not respond to 10 Hz rMS  
272 even when the E-field is closely matched based on e-field simulations.

273 **Realistic multiscale computer modeling predicts no major differences in rMS-induced**  
274 **depolarization of mouse and rat CA1 pyramidal neurons**

275 We assessed the impact of rMS on CA1 pyramidal neurons through a multiscale computational  
276 model that connects the physical input parameters of rMS to dendritic and axonal morphologies  
277 (Fig. 6). This approach was necessary because our morphological analysis might not have  
278 encompassed distinctions pertinent to the neuronal activation induced by rMS.

279 When examining the dendritic architecture of CA1 neurons in mice and rats, and  
280 employing a standardized artificial axon across all cells (c.f., Abbera et al., 2018; Shirinpour et al.,  
281 2021; Eichler et al., 2023), our simulations revealed no significant difference in the depolarization  
282 threshold elicited by rMS (Fig. 6A, B).

283 Subsequently, we investigated whether axonal morphologies might underlie the observed  
284 variability in our experimental outcomes. An additional series of simulations was conducted, this  
285 time integrating the authentic axonal morphologies of these neurons. Again, no significant  
286 differences in the depolarization thresholds were observed between the two groups (Fig. 6C).

287 A noteworthy insight emerged from these simulations: the axon's influence is pivotal in  
288 establishing the rMS-induced depolarization threshold (Table 1). We followed up on this  
289 observation, by establishing connections between the axons responsible for the lowest and highest  
290 rMS depolarization thresholds across all mouse and rat cells. Indeed, a 2-fold difference in the  
291 depolarization thresholds was observed in these simulations across all reconstructed neurons (Fig.  
292 6D). Yet, despite these simulations results, the dissimilarity in rMS-triggered plasticity between

293 mouse and rat tissue cultures remained unresolved, eluding a complete explanation based solely  
294 on the interactions of dendritic and axonal morphologies.

295 **Active and passive membrane properties reveal differences in excitability between mouse**  
296 **and rat CA1 pyramidal neurons**

297 Next, active and passive membrane properties were recorded from CA1 pyramidal neurons and  
298 analyzed. Indeed, this set of experiments identified significant differences in the passive and active  
299 properties between mouse and rat CA1 pyramidal neurons (Fig. 7).

300 The input resistance of mouse CA1 pyramidal neurons was significantly higher as  
301 compared to rat CA1 pyramidal neurons (mouse:  $156.8 \pm 11.65$  MOhm and rat:  $67.25 \pm 4.909$   
302 MOhm; Mann-Whitney test;  $p < 0.001$ ;  $U = 279$ ), while the cells of both mice and rats were resting  
303 at comparable membrane potentials (Fig. 7A-C). Consistently, the current-voltage (I/V) curves  
304 demonstrated that depolarizing mouse CA1 pyramidal neurons is more straightforward compared  
305 to cultured rat CA1 pyramidal neurons.

306 Looking at the active membrane properties (Fig. 7D-F) a similar trend was observed with  
307 the most striking differences being in the action potential induction threshold (mouse:  $-31.81 \pm$   
308  $0.877$  mV; rat:  $-28.47 \pm 0.744$  mV; Mann-Whitney test;  $p = 0.0021$ ;  $U = 794$ ) and the first spike  
309 latency (mouse:  $419.8 \pm 56.03$  ms; rat:  $715 \pm 77.36$  ms; Mann-Whitney test;  $p = 0.0074$ ;  $U = 15$ ;  
310 data not shown). Figure 7F, shows that current injections produced stronger responses in mouse  
311 CA1 pyramidal neurons than in rat neurons, i.e., higher action potential frequencies at a lower  
312 current injection. These results indicated that mouse CA1 pyramidal neurons are more excitable  
313 than rat neurons, suggesting that higher stimulation intensities may be needed to induce rMS-  
314 induced plasticity in rat tissue cultures.

315 **60 % MSO induces rMS-mediated plasticity in rat organotypic tissue cultures**

316 Subsequently, we tested whether a 10 Hz stimulation protocol applied at a higher intensity would  
317 induce plasticity in rat CA1 pyramidal neurons. Indeed, when rat tissue cultures were stimulated  
318 with 10 Hz rMS at 60 % MSO a robust increase in the mean mEPSC amplitude was detected (Fig.  
319 8A), similar to what we observe in the mouse cultures stimulated at 50 % MSO (cf. Fig. 1D and  
320 Fig 3C). In addition, a significant reduction in mean mIPSC amplitude was evident 2 - 4 h after  
321 rMS stimulation at 60 % MSO in a different set of rat tissue cultures (Fig. 8B; c.f., Fig. 1E). These  
322 results demonstrate that rat CA1 pyramidal neurons do express rMS-induced plasticity, but require  
323 a higher stimulation intensity for rMS-induced potentiation of excitatory synapses and depression  
324 of inhibition to occur.

## 325 **DISCUSSION**

326 In this study, we investigated the cellular determinants governing the threshold for synaptic  
327 plasticity induced by 10 Hz rMS. To comprehensively examine the effects of neuronal structure,  
328 excitability, and network activity, we adopted a cross-species approach utilizing mouse and rat  
329 entorhino-hippocampal slice cultures. We confirmed the well-documented potentiation of  
330 excitatory synapses and depression of inhibitory synapses in mouse CA1 pyramidal neurons,  
331 reaffirming the robustness of rMS-induced synaptic plasticity under tightly controlled  
332 experimental conditions. However, despite comparable neuronal morphologies (both dendrites and  
333 axons) and no significant disparities in spontaneous network activity, the standardization of  
334 electric fields using prospective electric field modeling failed to yield the same biological effects  
335 in rat CA1 pyramidal neurons. Instead, we observed that adjusting the stimulation protocol to  
336 account for the distinct active and passive membrane properties, i.e., lower excitability of rat CA1  
337 pyramidal neurons, led to both potentiation of excitatory synapses and depression of inhibitory  
338 synapses in rat CA1 pyramidal neurons. These findings highlight that the mere standardization of  
339 electric fields does not suffice to predict the after effects of rTMS even when neuronal  
340 morphologies and network activity are comparable. Accurate predictions require biophysically  
341 realistic compartmental models that reflect the intrinsic cellular properties of stimulated neurons  
342 and networks in distinct brain regions.

343 Over the past decade, the utilization of rTMS has experienced a significant surge in both  
344 research and clinical domains (Dayan et al., 2013; Paulus et al., 2013; Suppa et al., 2016;  
345 Blumberger et al., 2018; Lefaucheur et al., 2020; Lorentzen et al., 2022). Consequently, extensive  
346 efforts have been dedicated to identify the crucial parameters that influence the effects of rTMS  
347 on brain tissue (Deng et al., 2013; Lefaucheur et al., 2020; Zmeykina et al., 2020; Turi et al., 2021).



348 Among these parameters, the induced electric field emerges as a pivotal factor directly shaping the  
349 impact of rTMS on cortical tissue (Liu et al., 2018). While advancements in computational tools  
350 have enabled the calculation of rTMS-induced electric field (Thielscher et al., 2015), these models  
351 have primarily relied on mesoscopic structural parameters of the targeted stimulation area, i.e.,  
352 head and brain geometries. In recent years, there has been a growing adoption of multi-scale  
353 modeling approaches to investigate the impact of TMS on individual neurons (Kamitani et al.,  
354 2001; Aberra et al., 2018, 2020; Shirinpour et al., 2021). Notably, these neuronal models are being  
355 integrated into mesoscopic brain models, enabling exploration of the effects of cortical folding and  
356 the precise positioning of neurons, such as distinguishing between the gyral crown and gyral  
357 groove, in individual subjects (Salvador et al., 2011; Seo and Jun, 2019; Aberra et al., 2020; Turi  
358 et al., 2022). While these models represent a significant advancement toward standardization and  
359 precision medicine in the field, it is increasingly evident that solely modeling electric fields and  
360 their interactions with individual neuronal morphologies (derived from animal models) may not  
361 be sufficient to standardize the biological effects of rTMS across various brain regions and  
362 individuals (Turi et al., 2022). The findings from this cross-species study present experimental  
363 evidence, underscoring the insufficiency of meticulous experimental standardization and electric  
364 field modeling in guaranteeing robust biological effects of rTMS. Notably, computational  
365 modeling revealed that rat slice cultures exhibited a weaker induced electric field, despite the size  
366 difference compared to mouse hippocampal tissue cultures. However, even when efforts were  
367 made to match the generated electric fields between mouse and rat tissue cultures, it proved  
368 inadequate in reproducing the desired plasticity effects in the rat tissue cultures.

369 In this context, it is crucial to highlight that our experiments revealed no statistically  
370 significant morphological differences between the cultured CA1 pyramidal neurons of mice and

371 rats. The comprehensive analysis of both apical and basal dendrites demonstrated comparable total  
372 dendritic length, complexity, and overall volume in both rat and mouse pyramidal neurons of  
373 organotypic tissue cultures. These results align with previously published data that compared  
374 mouse and rat hippocampal CA1 neurons in acute slice preparations (Routh et al., 2009). However,  
375 it is worth noting that the total volume of these cells, apart from the observed morphologies  
376 features, was found to be higher in rat slices. While we cannot completely dismiss the possibility  
377 that the observed discrepancy may be attributed to differences between acute brain slices and tissue  
378 culture slices, it is essential to highlight a major advantage of tissue cultures. Specifically, the  
379 inclusion of 3-week-old tissue cultures, allowed for the assessment of neurons that are not acutely  
380 lesioned or denervation due to prior acute slicing, offering a distinct advantage in our study. This  
381 enabled us to study CA1 pyramidal neurons under steady state conditions and to reconstruct  
382 complete neuronal morphologies, encompassing the entire dendritic tree and axonal compartment.  
383 Such comprehensive reconstructions are deemed critical for accurately assessing the outcomes  
384 rTMS, as the interaction between the generated electric field and axons is of paramount importance  
385 (Siebner et al., 2022). Importantly, our investigation revealed no significant disparities in the  
386 axonal properties of cultured CA1 neurons between mice and rats. This finding suggests that the  
387 observed inability of rat CA1 neurons to exhibit synaptic plasticity cannot be trivially attributed to  
388 differences in axonal characteristics.

389         Nevertheless, our simulations provided robust experimental evidence that axon  
390 morphology matters. We identified axons that, upon exposure to electromagnetic fields, proved  
391 twice as effective at depolarizing neurons compared to their counterparts—this efficacy  
392 transcending the attached somata and dendritic morphologies. These insights call for a methodical  
393 evaluation of diverse axonal morphologies concerning rTMS-induced synaptic plasticity. These

394 inquiries should encompass considerations of myelination levels and the potential influence of  
395 oligodendrocytes on the depolarization and induction of plasticity prompted by rTMS. It is our  
396 proposition that within complex cortical networks, the existence of "super-responder cells" might  
397 be plausible—entities uniquely attuned to rTMS at a given stimulation intensity. This notion finds  
398 support in the observation that not all neurons of this and our previous studies (c.f., Vlachos et al.,  
399 2012; Lenz et al., 2016; Lenz et al., 2020; Eichler et al., 2023) displayed elevated mEPSC  
400 amplitudes or decreased mIPSC within the 2 – 4 h following stimulation. Consequently,  
401 uncovering the mechanistic basis of this variability becomes paramount, as it could illuminate the  
402 neural substrates and signaling pathways underlying the multifaceted response patterns induced  
403 by rTMS.

404         The results of the present study suggest that understanding the differential effects of rTMS  
405 in mouse and rat CA1 pyramidal neurons necessitates the consideration of intrinsic cellular  
406 properties. Neglecting these properties impedes our comprehensive explanation and prediction of  
407 observed differences in plasticity induction thresholds. In line with previous research on acute rat  
408 and mouse slices (Routh et al., 2009), our study revealed that rat CA1 pyramidal neurons exhibit  
409 a more depolarized action potential threshold compared to mice. This distinction renders rat  
410 neurons comparatively more resistant to excitation. Interestingly, our findings provide additional  
411 evidence by demonstrating that rat CA1 neurons possess significantly lower input resistance  
412 relative to their mouse counterparts. This observation reinforces the concept of reduced excitability  
413 in rat neurons. It is important to note, however, that the study by Routh and colleagues (2009)  
414 reported comparable input resistance between the two species, potentially attributable to the impact  
415 of acute slicing on neuronal integrity as discussed above.

416           Can morphological and biophysical properties alone provide sufficient prediction of  
417 biologically relevant outcomes of rTMS? It is clear that additional factors can affect cortical  
418 excitability, subsequently influencing how neurons respond to rTMS and modifying both the  
419 threshold, magnitude, and direction of rTMS-induced plasticity. Neuromodulators, such as  
420 dopamine, serotonin and noradrenaline have been demonstrated to regulate cortical excitability in  
421 both healthy and pathological conditions (Greenberg et al., 2000; Nitsche et al., 2006; Martorana  
422 et al., 2009; Michael A Nitsche et al., 2010; le Grand et al., 2011; Kuo et al., 2017). Specifically,  
423 dopamine has been implicated in the modulation of cortical excitability during action observation  
424 with TMS in human subjects (Strafella and Paus, 2000). Furthermore, neuromodulators can impact  
425 the capacity of neurons to express plasticity without affecting excitability and other baseline  
426 functional and structural properties of neurons and neural networks, a phenomenon known as  
427 metaplasticity (Abraham and Bear, 1996; Seol et al., 2007). It is important to also note that non-  
428 neuronal cells can significantly influence the capacity of neurons to express synaptic plasticity  
429 (Stellwagen et al., 2005; Henneberger et al., 2010; Allen, 2014; Andoh and Koyama, 2021; Sancho  
430 et al., 2021; Kleidonas et al., 2023). Our prior work has provided evidence that cytokines derived  
431 from microglia play a crucial role in facilitating rTMS-induced plasticity (Eichler et al., 2023).  
432 Finally, the impact of network activity on plasticity thresholds and the outcome of rTMS must be  
433 considered. These factors collectively underscore the multifaceted nature of the processes involved  
434 in influencing and modulating the outcomes of rTMS-induced plasticity. Organotypic slice  
435 cultures serve as valuable tools for investigating these and other aspects of rTMS-induced  
436 plasticity, highlighting the necessity for rigorously validated computer models that link the induced  
437 electric fields with biophysically realistic neurons and networks. These models hold the potential  
438 to predict the biological outcomes of rTMS, offering valuable insights into its effects and guiding

439 the adaptation of stimulation protocols to achieve consisted desired effects across different brain  
440 regions and individuals.

441 **REFERENCES**

- 442 Aberra AS, Peterchev AV, Grill WM (2018) Biophysically realistic neuron models for simulation of cortical  
443 stimulation. *J Neural Eng* 15:066023.
- 444 Aberra AS, Wang B, Grill WM, Peterchev AV (2020) Simulation of transcranial magnetic stimulation in  
445 head model with morphologically-realistic cortical neurons. *Brain Stimul* 13:175–189.
- 446 Abraham WC, Bear MF (1996) Metaplasticity: the plasticity of synaptic plasticity. *Trends Neurosci*  
447 19:126–130.
- 448 Allen NJ (2014) Astrocyte regulation of synaptic behavior. *Annu Rev Cell Dev Biol* 30:439–463.
- 449 Andoh M, Koyama R (2021) Microglia regulate synaptic development and plasticity. *Dev Neurobiol*  
450 81:568–590.
- 451 Blumberger DM, Vila-Rodriguez F, Thorpe KE, Feffer K, Noda Y, Giacobbe P, Knyahnytska Y, Kennedy SH,  
452 Lam RW, Daskalakis ZJ, Downar J (2018) Effectiveness of theta burst versus high-frequency repetitive  
453 transcranial magnetic stimulation in patients with depression (THREE-D): a randomised non-inferiority  
454 trial. *Lancet* 391:1683–1692.
- 455 Chen R, Classen J, Gerloff C, Celnik P, Wassermann EM, Hallett M, Cohen LG (1997) Depression of motor  
456 cortex excitability by low-frequency transcranial magnetic stimulation. *Neurology* 48:1398–1403.
- 457 Cirillo G, Di Pino G, Capone F, Ranieri F, Florio L, Todisco V, Tedeschi G, Funke K, Di Lazzaro V (2017)  
458 Neurobiological after-effects of non-invasive brain stimulation. *Brain Stimul* 10:1–18.
- 459 Cocchi L, Zalesky A, Nott Z, Whybird G, Fitzgerald PB, Breakspear M (2018) Transcranial magnetic  
460 stimulation in obsessive-compulsive disorder: A focus on network mechanisms and state dependence.  
461 *Neuroimage Clin* 19:661–674.
- 462 Dayan E, Censor N, Buch ER, Sandrini M, Cohen LG (2013) Noninvasive brain stimulation: from  
463 physiology to network dynamics and back. *Nat Neurosci* 16:838–844.
- 464 Deng Z-D, Lisanby SH, Peterchev AV (2013) Electric field depth-focality tradeoff in transcranial magnetic  
465 stimulation: simulation comparison of 50 coil designs. *Brain Stimul* 6:1–13.
- 466 Eichler A, Kleidonas D, Turi Z, Fliegau M, Kirsch M, Pfeifer D, Masuda T, Prinz M, Lenz M, Vlachos A  
467 (2023) Microglial Cytokines Mediate Plasticity Induced by 10 Hz Repetitive Magnetic Stimulation. *J*  
468 *Neurosci* 43:3042–3060.
- 469 Garnaat SL, Yuan S, Wang H, Philip NS, Carpenter LL (2018) Updates on Transcranial Magnetic  
470 Stimulation Therapy for Major Depressive Disorder. *Psychiatr Clin North Am* 41:419–431.
- 471 Goldsworthy MR, Müller-Dahlhaus F, Ridding MC, Ziemann U (2014) Inter-subject variability of LTD-like  
472 plasticity in human motor cortex: a matter of preceding motor activation. *Brain Stimul* 7:864–870.
- 473 Greenberg BD, Ziemann U, Corá-Locatelli G, Harmon A, Murphy DL, Keel JC, Wassermann EM (2000)  
474 Altered cortical excitability in obsessive-compulsive disorder. *Neurology* 54:142–142.

- 475 Guerra A, López-Alonso V, Cheeran B, Suppa A (2020) Variability in non-invasive brain stimulation  
476 studies: Reasons and results. *Neuroscience Letters* 719:133330.
- 477 Henneberger C, Papouin T, Oliet SHR, Rusakov DA (2010) Long-term potentiation depends on release of  
478 D-serine from astrocytes. *Nature* 463:232–236.
- 479 Hong Y, Liu Q, Peng M, Bai M, Li J, Sun R, Guo H, Xu P, Xie Y, Li Y, Liu L, Du J, Liu X, Yang B, Xu G (2020)  
480 High-frequency repetitive transcranial magnetic stimulation improves functional recovery by inhibiting  
481 neurotoxic polarization of astrocytes in ischemic rats. *J Neuroinflammation* 17:150.
- 482 Huang Y-Z, Edwards MJ, Rounis E, Bhatia KP, Rothwell JC (2005) Theta Burst Stimulation of the Human  
483 Motor Cortex. *Neuron* 45:201–206.
- 484 Jarsky T, Roxin A, Kath WL, Spruston N (2005) Conditional dendritic spike propagation following distal  
485 synaptic activation of hippocampal CA1 pyramidal neurons. *Nat Neurosci* 8:1667–1676.
- 486 Kamitani Y, Bhalodia VM, Kubota Y, Shimojo S (2001) A model of magnetic stimulation of neocortical  
487 neurons. *Neurocomputing* 38–40:697–703.
- 488 Kleidonas D, Kirsch M, Andrieux G, Pfeifer D, Boerries M, Vlachos A (2023) Microglia modulate TNF $\alpha$ -  
489 mediated synaptic plasticity. *Glia* 71:2117–2136.
- 490 Kuo H-I, Paulus W, Batsikadze G, Jamil A, Kuo M-F, Nitsche MA (2017) Acute and Chronic Noradrenergic  
491 Effects on Cortical Excitability in Healthy Humans. *Int J Neuropsychopharmacol* 20:634–643.
- 492 le Grand SM, Supornsilpchai W, Saengjaroentharn C, Srikiatkachorn A (2011) Serotonin Depletion Leads  
493 to Cortical Hyperexcitability and Trigeminal Nociceptive Facilitation via the Nitric Oxide Pathway.  
494 *Headache: The Journal of Head and Face Pain* 51:1152–1160.
- 495 Lefaucheur J-P et al. (2020) Evidence-based guidelines on the therapeutic use of repetitive transcranial  
496 magnetic stimulation (rTMS): An update (2014-2018). *Clin Neurophysiol* 131:474–528.
- 497 Lenz M, Eichler A, Kruse P, Strehl A, Rodriguez-Rozada S, Goren I, Yogev N, Frank S, Waisman A, Deller T,  
498 Jung S, Maggio N, Vlachos A (2020) Interleukin 10 Restores Lipopolysaccharide-Induced Alterations in  
499 Synaptic Plasticity Probed by Repetitive Magnetic Stimulation. *Front Immunol* 11:614509.
- 500 Lenz M, Galanis C, Müller-Dahlhaus F, Opitz A, Wierenga CJ, Szabó G, Ziemann U, Deller T, Funke K,  
501 Vlachos A (2016) Repetitive magnetic stimulation induces plasticity of inhibitory synapses. *Nat Commun*  
502 7:10020.
- 503 Lenz M, Platschek S, Priesemann V, Becker D, Willems LM, Ziemann U, Deller T, Müller-Dahlhaus F,  
504 Jedlicka P, Vlachos A (2015) Repetitive magnetic stimulation induces plasticity of excitatory  
505 postsynapses on proximal dendrites of cultured mouse CA1 pyramidal neurons. *Brain Struct Funct*  
506 220:3323–3337.
- 507 Liu A, Vöröslakos M, Kronberg G, Henin S, Krause MR, Huang Y, Opitz A, Mehta A, Pack CC, Krekelberg B,  
508 Berényi A, Parra LC, Melloni L, Devinsky O, Buzsáki G (2018) Immediate neurophysiological effects of  
509 transcranial electrical stimulation. *Nat Commun* 9:5092.
- 510 López-Alonso V, Cheeran B, Río-Rodríguez D, Fernández-Del-Olmo M (2014) Inter-individual variability in  
511 response to non-invasive brain stimulation paradigms. *Brain Stimul* 7:372–380.

- 512 Lorentzen R, Nguyen TD, McGirr A, Hieronymus F, Østergaard SD (2022) The efficacy of transcranial  
513 magnetic stimulation (TMS) for negative symptoms in schizophrenia: a systematic review and meta-  
514 analysis. *Schizophr* 8:1–12.
- 515 Martorana A, Mori F, Esposito Z, Kusayanagi H, Monteleone F, Codecà C, Sancesario G, Bernardi G, Koch  
516 G (2009) Dopamine Modulates Cholinergic Cortical Excitability in Alzheimer’s Disease Patients.  
517 *Neuropsychopharmacol* 34:2323–2328.
- 518 Michael A Nitsche, Katia Monte-Silva, Min-Fang Kuo, Walter Paulus (2010) Dopaminergic Impact on  
519 Cortical Excitability in Humans. *Reviews in the Neurosciences* 21:289–298.
- 520 Moretti J, Terstege DJ, Poh EZ, Epp JR, Rodger J (2022) Low intensity repetitive transcranial magnetic  
521 stimulation modulates brain-wide functional connectivity to promote anti-correlated c-Fos expression.  
522 *Sci Rep* 12:20571.
- 523 Müller-Dahlhaus F, Vlachos A (2013) Unraveling the cellular and molecular mechanisms of repetitive  
524 magnetic stimulation. *Front Mol Neurosci* 6:50.
- 525 Nitsche MA, Lampe C, Antal A, Liebetanz D, Lang N, Tergau F, Paulus W (2006) Dopaminergic modulation  
526 of long-lasting direct current-induced cortical excitability changes in the human motor cortex. *European*  
527 *Journal of Neuroscience* 23:1651–1657.
- 528 Opitz A, Windhoff M, Heidemann RM, Turner R, Thielscher A (2011) How the brain tissue shapes the  
529 electric field induced by transcranial magnetic stimulation. *Neuroimage* 58:849–859.
- 530 Paulus W, Peterchev AV, Ridding M (2013) Transcranial electric and magnetic stimulation: technique and  
531 paradigms. *Handb Clin Neurol* 116:329–342.
- 532 Peterchev AV, Wagner TA, Miranda PC, Nitsche MA, Paulus W, Lisanby SH, Pascual-Leone A, Bikson M  
533 (2012) Fundamentals of transcranial electric and magnetic stimulation dose: definition, selection, and  
534 reporting practices. *Brain Stimul* 5:435–453.
- 535 Rehn S, Eslick GD, Brakoulias V (2018) A Meta-Analysis of the Effectiveness of Different Cortical Targets  
536 Used in Repetitive Transcranial Magnetic Stimulation (rTMS) for the Treatment of Obsessive-Compulsive  
537 Disorder (OCD). *Psychiatr Q* 89:645–665.
- 538 Romero MC, Merken L, Janssen P, Davare M (2022) Neural effects of continuous theta-burst stimulation  
539 in macaque parietal neurons. *Elife* 11:e65536.
- 540 Routh BN, Johnston D, Harris K, Chitwood RA (2009) Anatomical and Electrophysiological Comparison of  
541 CA1 Pyramidal Neurons of the Rat and Mouse. *J Neurophysiol* 102:2288–2302.
- 542 Salvador R, Silva S, Basser PJ, Miranda PC (2011) Determining which mechanisms lead to activation in  
543 the motor cortex: a modeling study of transcranial magnetic stimulation using realistic stimulus  
544 waveforms and sulcal geometry. *Clin Neurophysiol* 122:748–758.
- 545 Sancho L, Contreras M, Allen NJ (2021) Glia as sculptors of synaptic plasticity. *Neurosci Res* 167:17–29.
- 546 Saturnino GB, Puonti O, Nielsen JD, Antonenko D, Madsen KH, Thielscher A (2019) SimNIBS 2.1: A  
547 Comprehensive Pipeline for Individualized Electric Field Modelling for Transcranial Brain Stimulation. In:  
548 *Brain and Human Body Modeling: Computational Human Modeling at EMBC 2018* (Makarov S, Horner



- 549 M, Noetscher G, eds). Cham (CH): Springer. Available at:  
550 <http://www.ncbi.nlm.nih.gov/books/NBK549569/> [Accessed June 13, 2023].
- 551 Seo H, Jun SC (2019) Relation between the electric field and activation of cortical neurons in transcranial  
552 electrical stimulation. *Brain Stimulation* 12:275–289.
- 553 Seol GH, Ziburkus J, Huang S, Song L, Kim IT, Takamiya K, Hugarir RL, Lee H-K, Kirkwood A (2007)  
554 Neuromodulators Control the Polarity of Spike-Timing-Dependent Synaptic Plasticity. *Neuron* 55:919–  
555 929.
- 556 Shirinpour S, Hananeia N, Rosado J, Tran H, Galanis C, Vlachos A, Jedlicka P, Queisser G, Opitz A (2021)  
557 Multi-scale modeling toolbox for single neuron and subcellular activity under Transcranial Magnetic  
558 Stimulation. *Brain Stimul* 14:1470–1482.
- 559 Siebner HR et al. (2022) Transcranial magnetic stimulation of the brain: What is stimulated? – A  
560 consensus and critical position paper. *Clin Neurophysiol* 140:59–97.
- 561 Somaa FA, de Graaf TA, Sack AT (2022) Transcranial Magnetic Stimulation in the Treatment of  
562 Neurological Diseases. *Front Neurol* 13:793253.
- 563 Stellwagen D, Beattie EC, Seo JY, Malenka RC (2005) Differential regulation of AMPA receptor and GABA  
564 receptor trafficking by tumor necrosis factor-alpha. *J Neurosci* 25:3219–3228.
- 565 Strafella AP, Paus T (2000) Modulation of cortical excitability during action observation: a transcranial  
566 magnetic stimulation study. *Neuroreport* 11:2289–2292.
- 567 Suppa A, Huang Y-Z, Funke K, Ridding MC, Cheeran B, Di Lazzaro V, Ziemann U, Rothwell JC (2016) Ten  
568 Years of Theta Burst Stimulation in Humans: Established Knowledge, Unknowns and Prospects. *Brain*  
569 *Stimulation* 9:323–335.
- 570 Tang AD, Bennett W, Bindoff AD, Bolland S, Collins J, Langley RC, Garry MI, Summers JJ, Hinder MR,  
571 Rodger J, Canty AJ (2021) Subthreshold repetitive transcranial magnetic stimulation drives structural  
572 synaptic plasticity in the young and aged motor cortex. *Brain Stimulation* 14:1498–1507.
- 573 Thielscher A, Antunes A, Saturnino GB (2015) Field modeling for transcranial magnetic stimulation: A  
574 useful tool to understand the physiological effects of TMS? In: 2015 37th Annual International  
575 Conference of the IEEE Engineering in Medicine and Biology Society (EMBC), pp 222–225.
- 576 Thielscher A, Opitz A, Windhoff M (2011) Impact of the gyral geometry on the electric field induced by  
577 transcranial magnetic stimulation. *Neuroimage* 54:234–243.
- 578 Tokay T, Holl N, Kirschstein T, Zschorlich V, Köhling R (2009) High-frequency magnetic stimulation  
579 induces long-term potentiation in rat hippocampal slices. *Neurosci Lett* 461:150–154.
- 580 Tokay T, Kirschstein T, Rohde M, Zschorlich V, Köhling R (2014) NMDA receptor-dependent  
581 metaplasticity by high-frequency magnetic stimulation. *Neural Plast* 2014:684238.
- 582 Turi Z, Hananeia N, Shirinpour S, Opitz A, Jedlicka P, Vlachos A (2022) Dosing Transcranial Magnetic  
583 Stimulation of the Primary Motor and Dorsolateral Prefrontal Cortices With Multi-Scale Modeling. *Front*  
584 *Neurosci* 16:929814.

- 585 Turi Z, Lenz M, Paulus W, Mittner M, Vlachos A (2021) Selecting stimulation intensity in repetitive  
586 transcranial magnetic stimulation studies: A systematic review between 1991 and 2020. *European*  
587 *Journal of Neuroscience* 53:3404–3415.
- 588 Vallence A-M, Goldsworthy MR, Hodyl NA, Semmler JG, Pitcher JB, Ridding MC (2015) Inter- and intra-  
589 subject variability of motor cortex plasticity following continuous theta-burst stimulation. *Neuroscience*  
590 304:266–278.
- 591 Vlachos A, Müller-Dahlhaus F, Rosskopp J, Lenz M, Ziemann U, Deller T (2012) Repetitive magnetic  
592 stimulation induces functional and structural plasticity of excitatory postsynapses in mouse organotypic  
593 hippocampal slice cultures. *J Neurosci* 32:17514–17523.
- 594 Voigt J, Carpenter L, Leuchter A (2019) A systematic literature review of the clinical efficacy of repetitive  
595 transcranial magnetic stimulation (rTMS) in non-treatment resistant patients with major depressive  
596 disorder. *BMC Psychiatry* 19:13.
- 597 Zmeykina E, Mittner M, Paulus W, Turi Z (2020) Weak rTMS-induced electric fields produce neural  
598 entrainment in humans. *Sci Rep* 10:11994.

599 **FIGURE LEGENDS**

600 **Figure 1: 10 Hz repetitive magnetic stimulation (rMS) at 50% MSO induces synaptic**  
601 **plasticity in mouse CA1 pyramidal neurons.**

602 **(A)** Schematic illustration of the experimental setting. Organotypic tissue cultures are stimulated  
603 in a standard 35 mm petri dish filled with extracellular solution using a 70 mm figure-of-eight coil  
604 (900 pulses, 10 Hz, at 50 % maximum stimulator output). **(B)** Overview of an organotypic tissue  
605 culture. DAPI nuclear staining was used for visualization of cytoarchitecture. DG, Dentate gyrus;  
606 EC, entorhinal cortex; CA1 and CA3, *Cornu Ammonis* areas 1 and 3. Scale bar, 500  $\mu\text{m}$ . **(C)**  
607 Patched CA1 pyramidal neurons filled with biocytin and identified *post hoc* with streptavidin-  
608 A488. Scale bar, 50  $\mu\text{m}$ . **(D, E)** Sample traces and group data of AMPA receptor mediated  
609 miniature excitatory post synaptic currents (mEPSCs) recorded from mouse CA1 pyramidal  
610 neurons in sham-(control) and rMS-stimulated cultures 2 – 4 h after stimulation (control, n = 31  
611 cells; rMS, n = 28 cells; Mann–Whitney test). **(F, G)** Sample traces and group data of GABA  
612 receptor mediated miniature inhibitory post synaptic currents (mIPSCs) recorded from mouse CA1  
613 pyramidal neurons in sham-(control) and rMS-stimulated cultures 2 – 4 h after stimulation  
614 (control, n = 14 cells; rMS, n = 14 cells; Mann–Whitney test). Individual data points are indicated  
615 in this and the following figures by gray dots. Data are mean  $\pm$  SEM. NS, Not significant.  
616 \*p < 0.05. \*\*p < 0.01.

617 **Figure 2: 10 Hz repetitive magnetic stimulation (rMS) at 50 % maximum stimulator output**  
618 **does not affect synaptic transmission in rat CA1 pyramidal neurons.**

619 **(A)** Overview images of a mouse and rat organotypic tissue culture. DG, Dentate gyrus; EC,  
620 entorhinal cortex; CA1 and CA3, *Cornu Ammonis* areas 1 and 3. Scale bar, 500  $\mu\text{m}$ . **(C)** Patched  
621 rat CA1 pyramidal neurons filled with biocytin and identified *post hoc* with streptavidin-A488.

622 Scale bar, 50  $\mu\text{m}$ . **(C, D)** Sample traces and group data of AMPA receptor mediated mEPSCs  
623 recorded from rat CA1 pyramidal neurons in sham-(control) and rMS-stimulated cultures 2 – 4 h  
624 after stimulation (control, n = 38 cells; rMS, n = 71 cells; Mann–Whitney test). **(E, F)** Sample  
625 traces and group data of GABA receptor mediated miniature inhibitory post synaptic currents  
626 (mIPSCs) recorded from rat CA1 pyramidal neurons in sham-(control) and rMS-stimulated  
627 cultures 2 – 4 h after stimulation (control, n = 12 cells; rMS, n = 9 cells; Mann–Whitney test). Data  
628 are mean  $\pm$  SEM. NS, Not significant.

629 **Figure 3: Modeling of repetitive magnetic stimulation (rMS)-induced electric fields in mouse**  
630 **and rat tissue cultures.**

631 **(A)** Visualization of the macroscopic electric field simulations generated by rMS *in vitro*. **(B)**  
632 Three-dimensional mesh models of mouse and rat organotypic tissue cultures and the electric fields  
633 generated by a single-pulse of rMS, respectively. **(C)** Comparison of the maximum electric field  
634 generated at distinct stimulation intensities in mouse and rat tissue cultures. The electric field  
635 generated in mouse slice cultures at 50 % maximum stimulator output is attained with 53%  
636 maximum stimulator output in rat tissue cultures. **(D)** Group data of AMPA receptor mediated  
637 mEPSCs recorded from rat CA1 pyramidal neurons in sham-(control) and rMS-stimulated cultures  
638 stimulated with 53 % maximum stimulator output and recorded 2 – 4 h after stimulation (control,  
639 n = 12 cells; rMS, n = 12 cells; Mann–Whitney test). Data are mean  $\pm$  SEM. NS, Not significant.

640 **Figure 4: No significant differences in baseline network activity in mouse and rat tissue**  
641 **cultures.**

642 (A-B) Overview images of mouse and rat tissue culture on high-density multi electrode array chips.  
643 DG, Dentate gyrus; EC, entorhinal cortex; CA1 and CA3, *Cornu Ammonis* areas 1 and 3. (C)  
644 Raster plots of spikes during a 10-minute recording period in whole mouse and rat tissue cultures.  
645 (D-F) Group data of mean firing rate and mean field potential rate from mouse and rat tissue  
646 cultures (mouse, n = 4 cultures; rat, n = 5 cultures; Mann–Whitney test). Data are mean  $\pm$  SEM.  
647 NS, Not significant.

648 **Figure 5: No significant morphological differences of CA1 pyramidal neurons in mouse and**  
649 **rat tissue cultures.**

650 (A, B) Examples of CA1 pyramidal neurons that were patched and filled with biocytin, later  
651 identified *post hoc* with streptavidin-A488, along with three-dimensional neuronal reconstructions  
652 of both mouse and rat CA1 pyramidal neurons. (C-H) Group data of mouse and rat apical and  
653 basal dendrites (mouse, n = 11 cells; rat, n = 11 cells; statistical comparisons for panels C, D, G  
654 and H were performed with Mann–Whitney test; statistical comparisons for panels E and F were  
655 performed with 2-way ANOVA). (I) Rat CA1 pyramidal neuron patched and filled with biocytin,  
656 identified *post hoc* with streptavidin-A488, and used for comprehensive neuronal reconstruction,  
657 encompassing dendritic and axonal neuronal structures. Scale bar, 50  $\mu$ m. (J-L) Group data of  
658 mouse and rat axons (mouse, n = 6 cells; rat, n = 6 cells; statistical comparisons for panels J and L  
659 were performed with Mann–Whitney test; statistical comparisons for panel K were performed with  
660 2-way ANOVA).

661 **Figure 6: Multiscale computer modeling of electromagnetic stimulation.**

662 (A) Neuronal responses, i.e., changes in membrane voltage, to electromagnetic stimulation were  
663 modeled in realistic dendritic and axonal morphologies from reconstructed mouse and rat CA1  
664 pyramidal neurons. (B) Group data of realistic dendritic morphologies with a standardized artificial  
665 axon (mouse, n = 6 cells; rat, n = 6 cells; Mann–Whitney test). (C) Group data of simulations with  
666 realistic dendritic and axonal morphologies (mouse, n = 6 cells; rat, n = 6 cells; Mann–Whitney  
667 test). (D) Group data for mouse and rat CA1 pyramidal neurons, categorizing those with axons  
668 exhibiting lowest (left) and highest (right) rMS depolarization thresholds (mouse, n = 6 cells; rat,  
669 n = 6 cells; Kruskal-Wallis test). Data are mean  $\pm$  SEM. NS, Not significant.

670 **Figure 7: Rat CA1 pyramidal neurons exhibit lower excitability in comparison to mice.**

671 (A) Sample traces from input-output recordings of CA1 pyramidal neurons of mouse and rat tissue  
672 cultures. (B, C) Group data of resting membrane potential and input resistance from mouse and  
673 rat CA1 pyramidal neurons (mouse, n = 44 cells; rat, n = 56 cells; Mann–Whitney test). (D, E)  
674 Group data of action potential (AP) amplitude and threshold from mouse and rat CA1 pyramidal  
675 neurons (mouse, n = 44 cells; rat, n = 56 cells; Mann–Whitney test). (F) I-F curve of CA1  
676 pyramidal neurons of mouse and rat tissue cultures (mouse, n = 52 cells; rat, n = 63 cells; 2-way  
677 ANOVA). Data are mean  $\pm$  SEM. NS, Not significant. \*\*p < 0.01. \*\*\*p < 0.001.

678 **Figure 8: 10 Hz repetitive magnetic stimulation (rMS) at 60 % MSO induces synaptic**  
679 **plasticity in rat CA1 pyramidal neurons.**

680 (A) Group data of AMPA receptor mediated mEPSCs recorded from rat CA1 pyramidal  
681 neurons from sham- (control) and rMS- stimulated cultures (control, n = 34 cells; rMS,  
682 n = 16 cells; Mann–Whitney test). (C, D) Sample traces and group data of miniature

683 inhibitory post synaptic currents (mIPSCs) recorded from rat CA1 pyramidal neurons from  
684 sham- (control) and rMS- stimulated cultures (control, n = 14 cells; rMS, n = 17 cells;  
685 Mann–Whitney test. One data point outside of axis limits in mIPSC amplitude and  
686 frequency respectively). Data are mean  $\pm$  SEM. NS, Not significant. \* $p < 0.05$ .  
687 \*\*\* $p < 0.001$ .

**Figure 1**

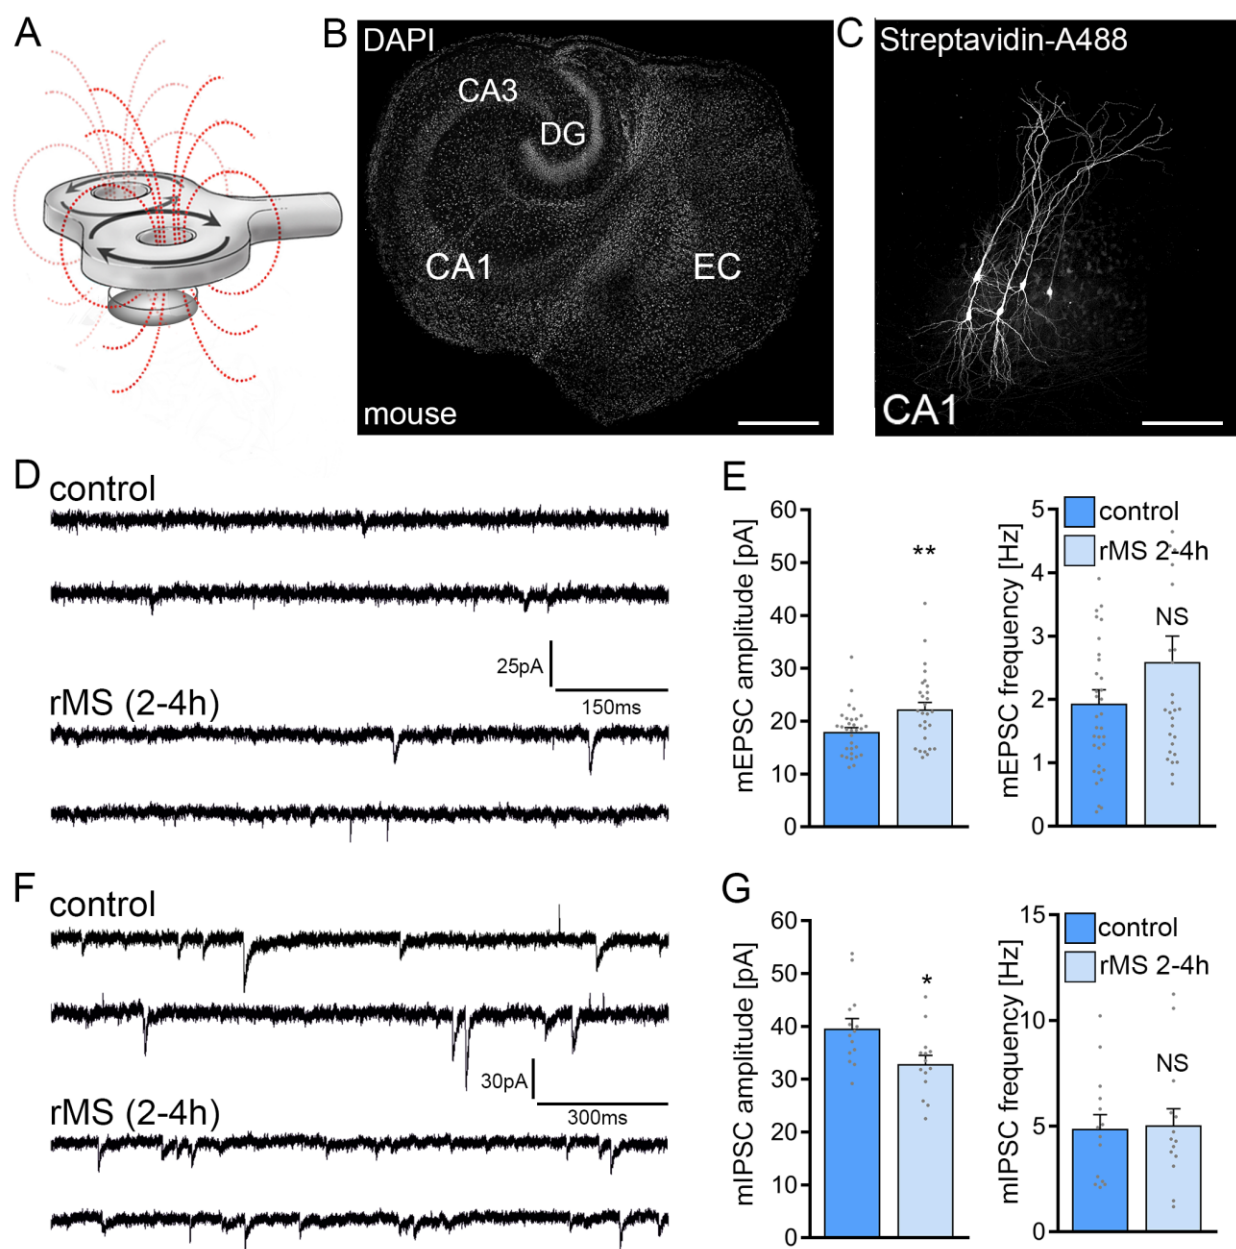



**Figure 2**

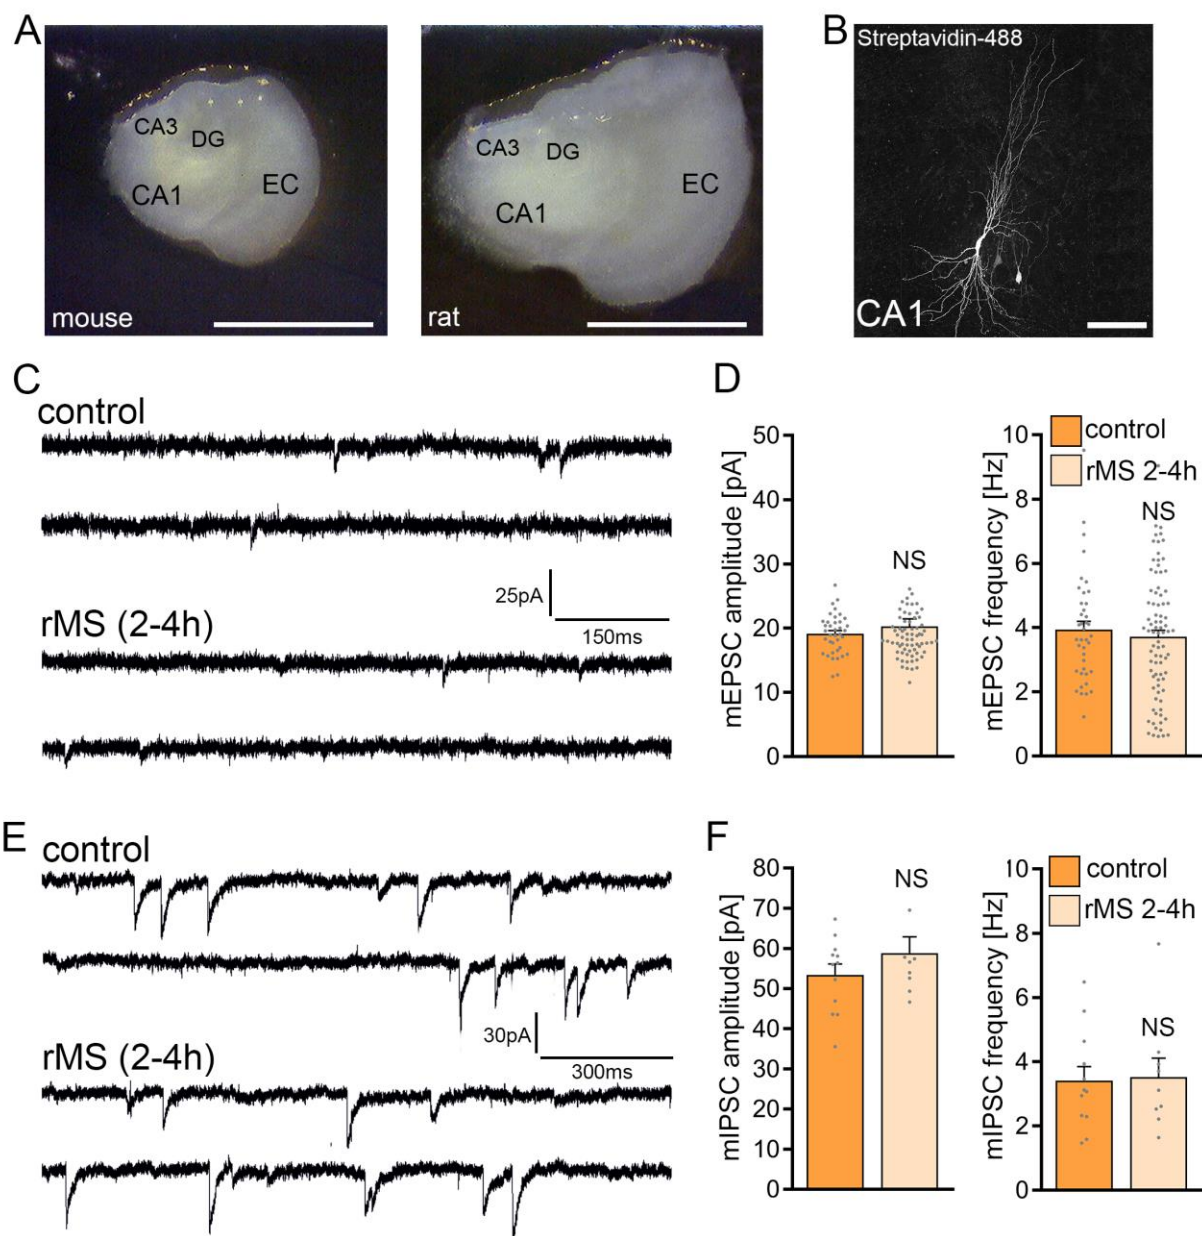

**Figure 3**

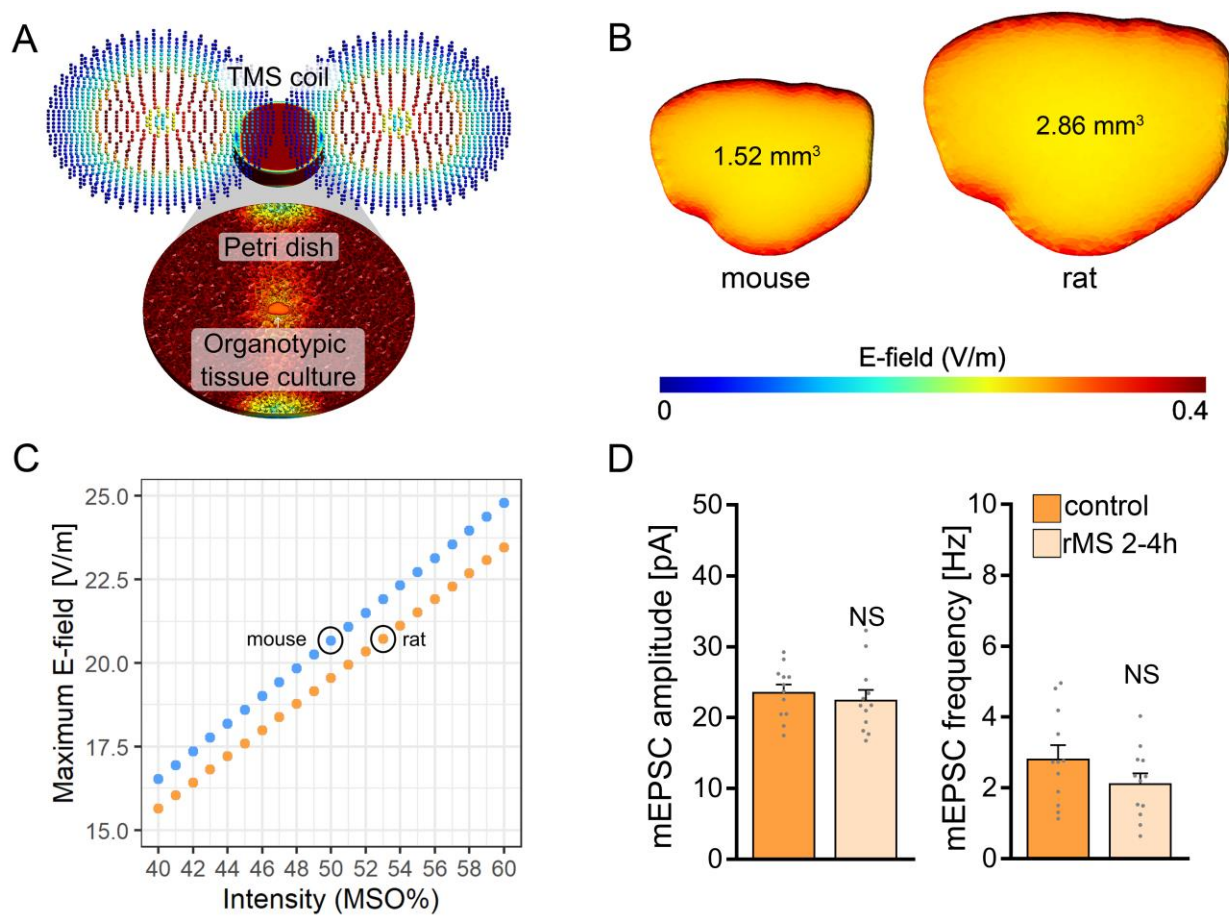

**Figure 4**

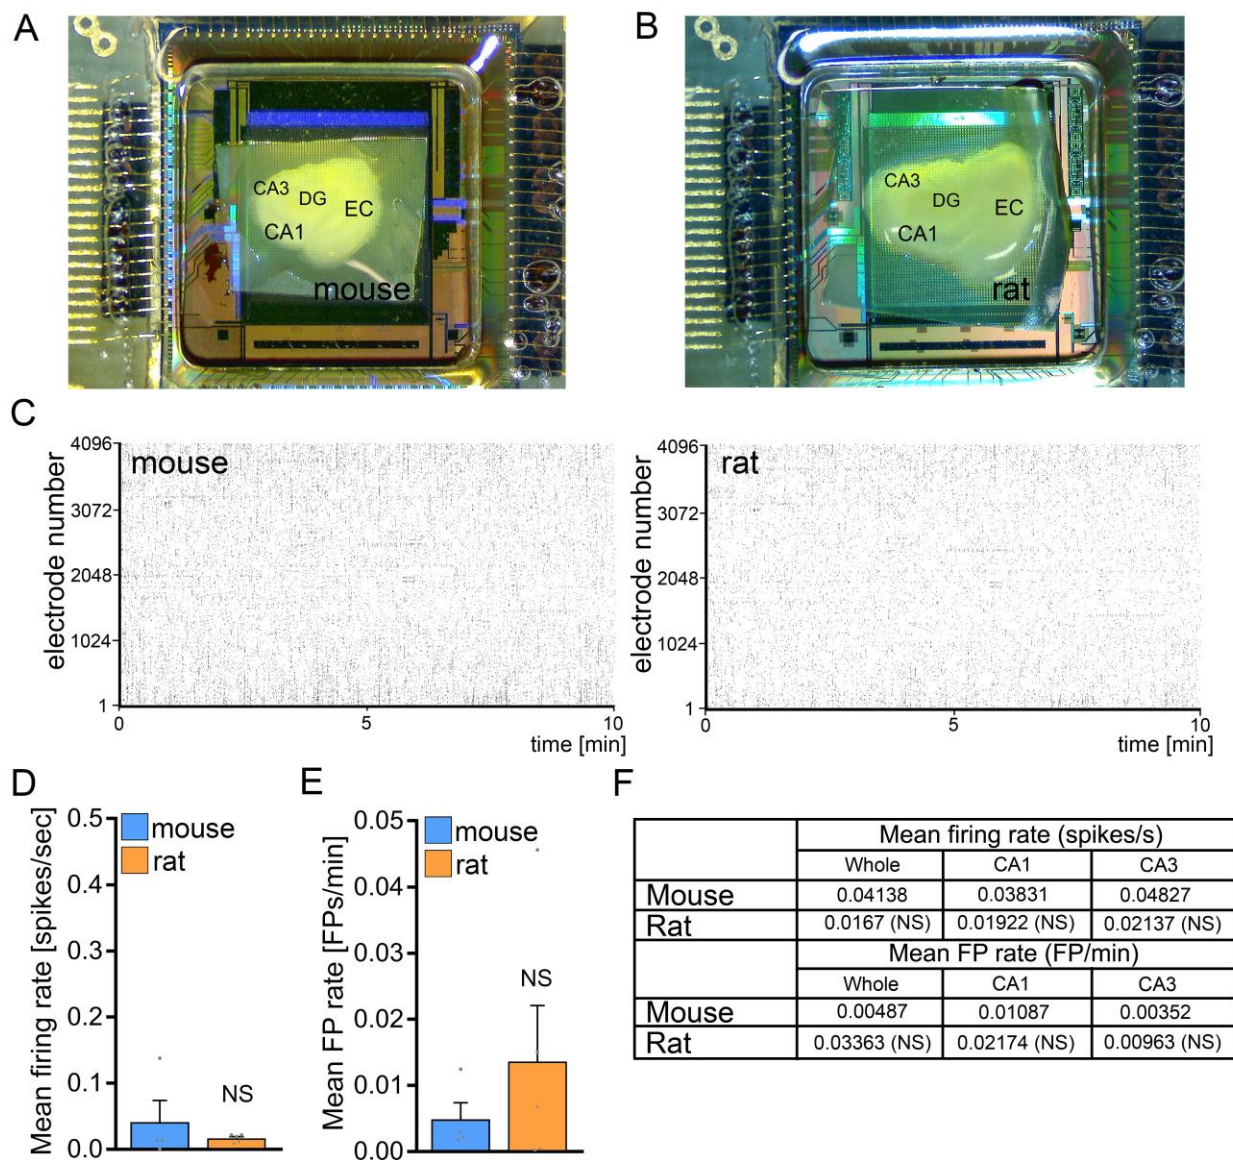

**Figure 5**

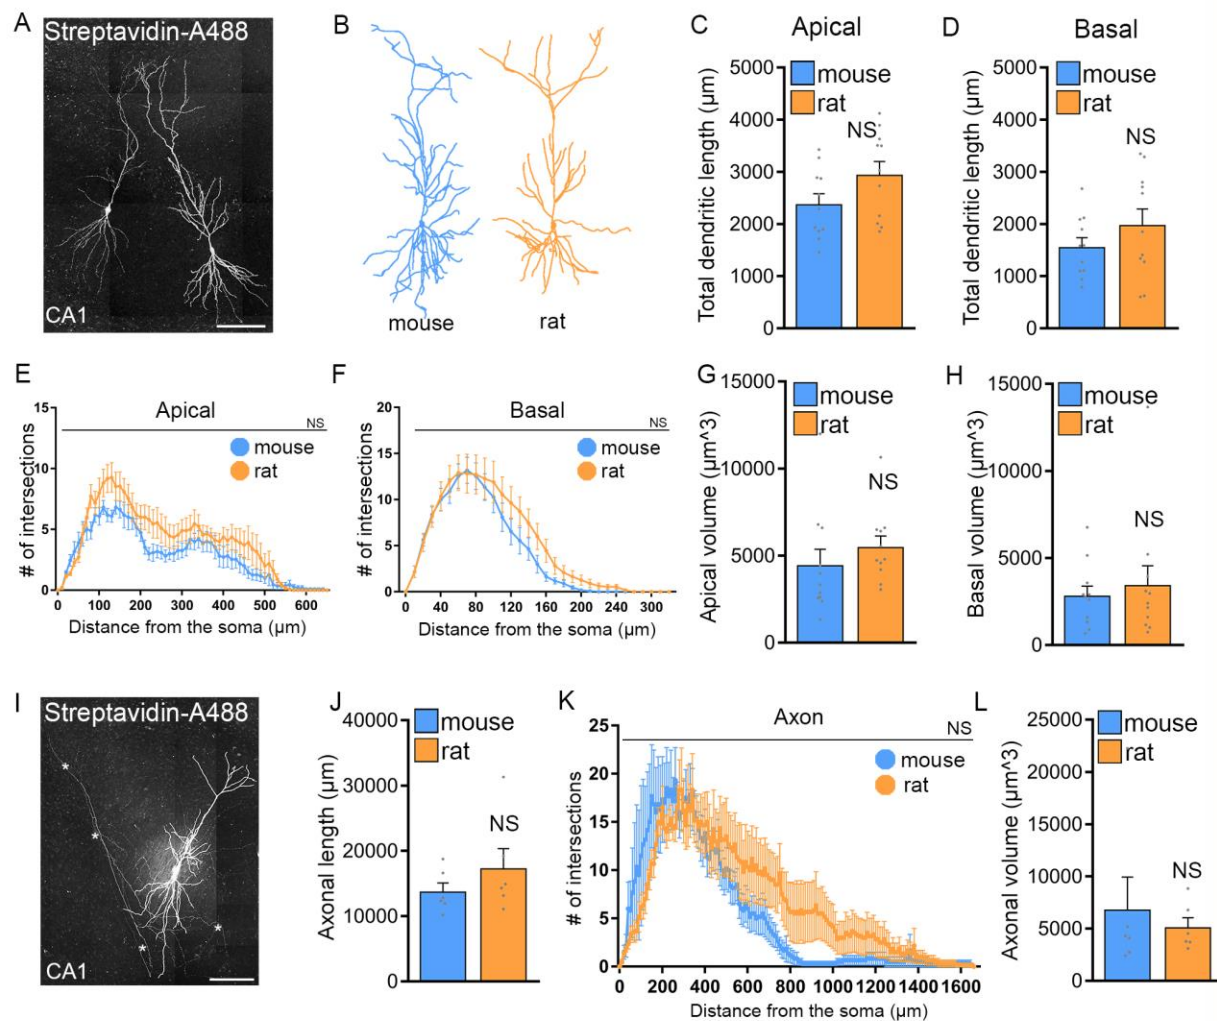

**Figure 6**

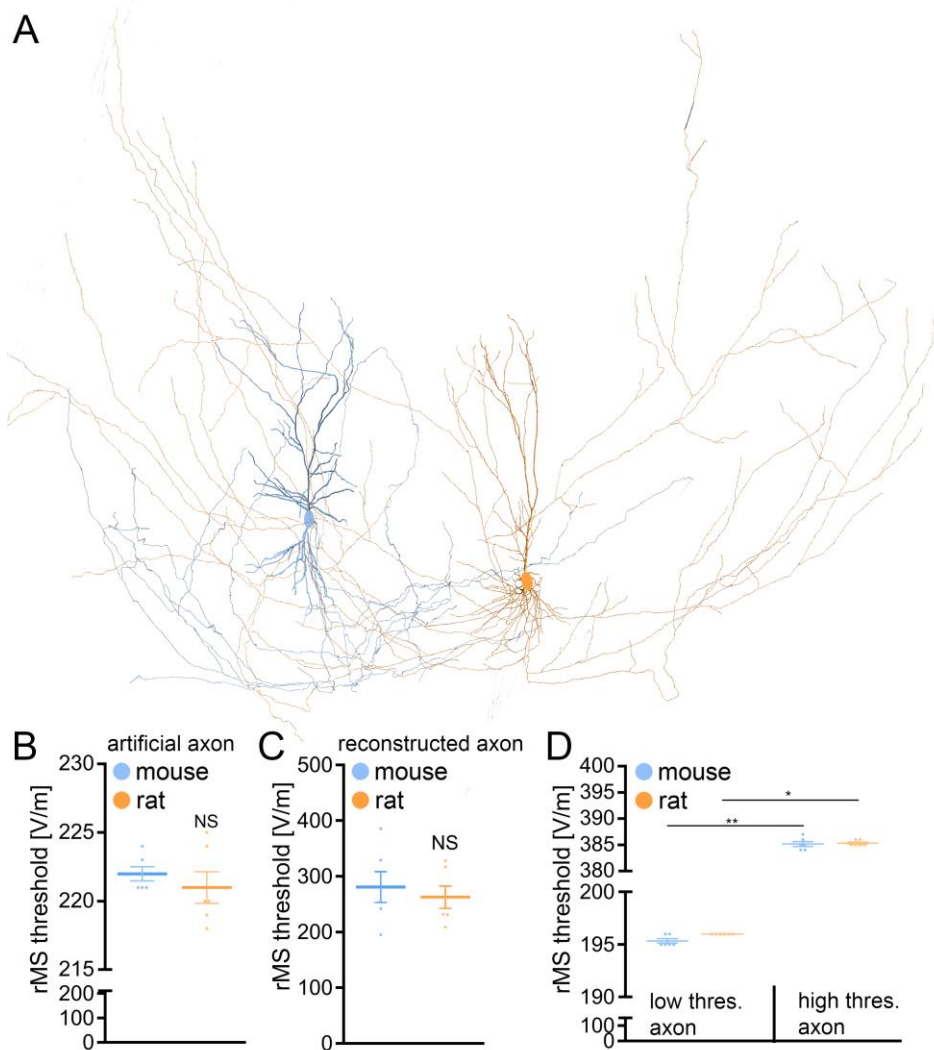

**Figure 7**

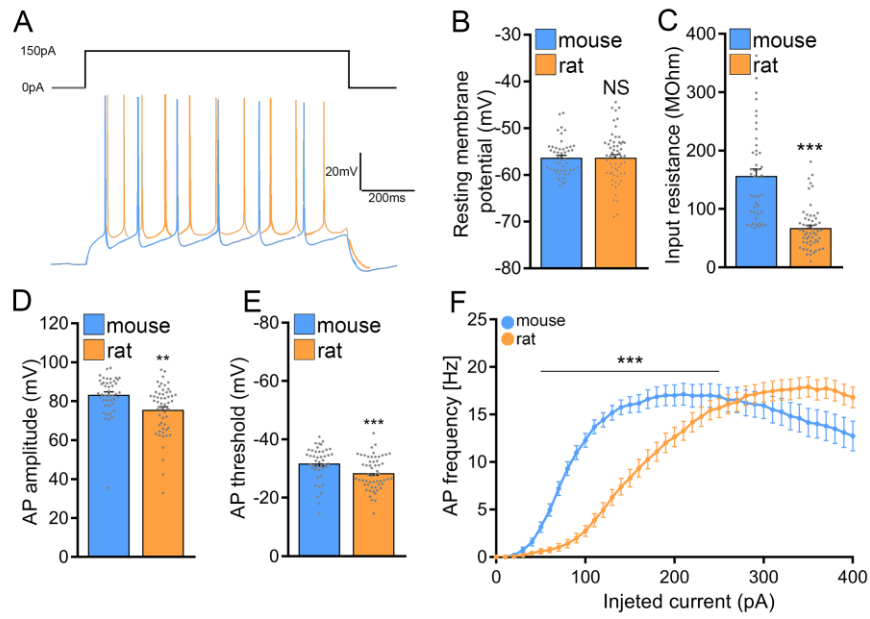

**Figure 8**

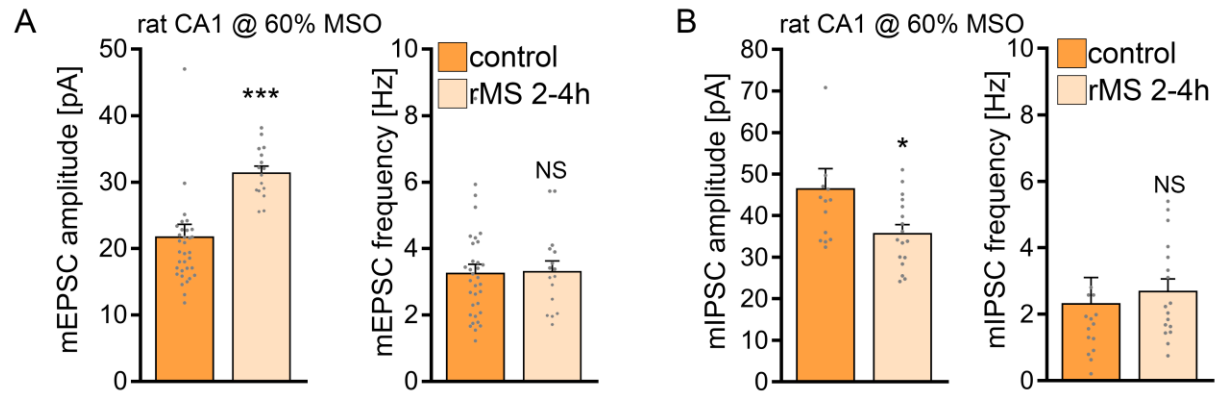

Source: https://www.biorxiv.org/content/10.1101/2023.09.25.559399v1.full.pdf
